# Supplementary material for: Synthesis of New Liquid-Crystalline Compounds Based on Terminal Benzyloxy Group: Characterization, DFT and Mesomorphic Properties
Source: MDPI journal article supplement (doi:10.3390/molecules28093804), 2023-04-28
Supplement: s1 [file s1]

## Supplementary Materials

# Synthesis of New Liquid-Crystalline Compounds Based on Terminal Benzyloxy Group: Characterization, DFT and Mesomorphic Properties

Alaa Z. Omar <sup>1</sup>, Mohammed L. Alazmi <sup>1</sup>, Mai S. Alsubaie <sup>1</sup>, Ezzat A. Hamed <sup>1,\*</sup>,  
Hoda A. Ahmed <sup>2,\*</sup> and Mohamed A. El-Atawy <sup>1,3</sup>

### *Instruments and Apparatus*

Melting points were determined by MEL-TEMP II melting point apparatus in open glass capillaries. The IR spectra were recorded as potassium bromide (KBr) discs on a Perkin-Elmer FT-IR (Fourier-Transform Infrared Spectroscopy), Faculty of Science, Alexandria University. The NMR spectra were carried out at ambient temperature (~25 °C) on a (JEOL) 400 MHz spectrophotometer using tetramethylsilane (TMS) as an internal standard, NMR Unit, Faculty of Pharmacy, Mansoura University. Elemental analyses were analyzed at the Regional Center for Mycology and Biotechnology, Al-Azhar University, Cairo, Egypt.

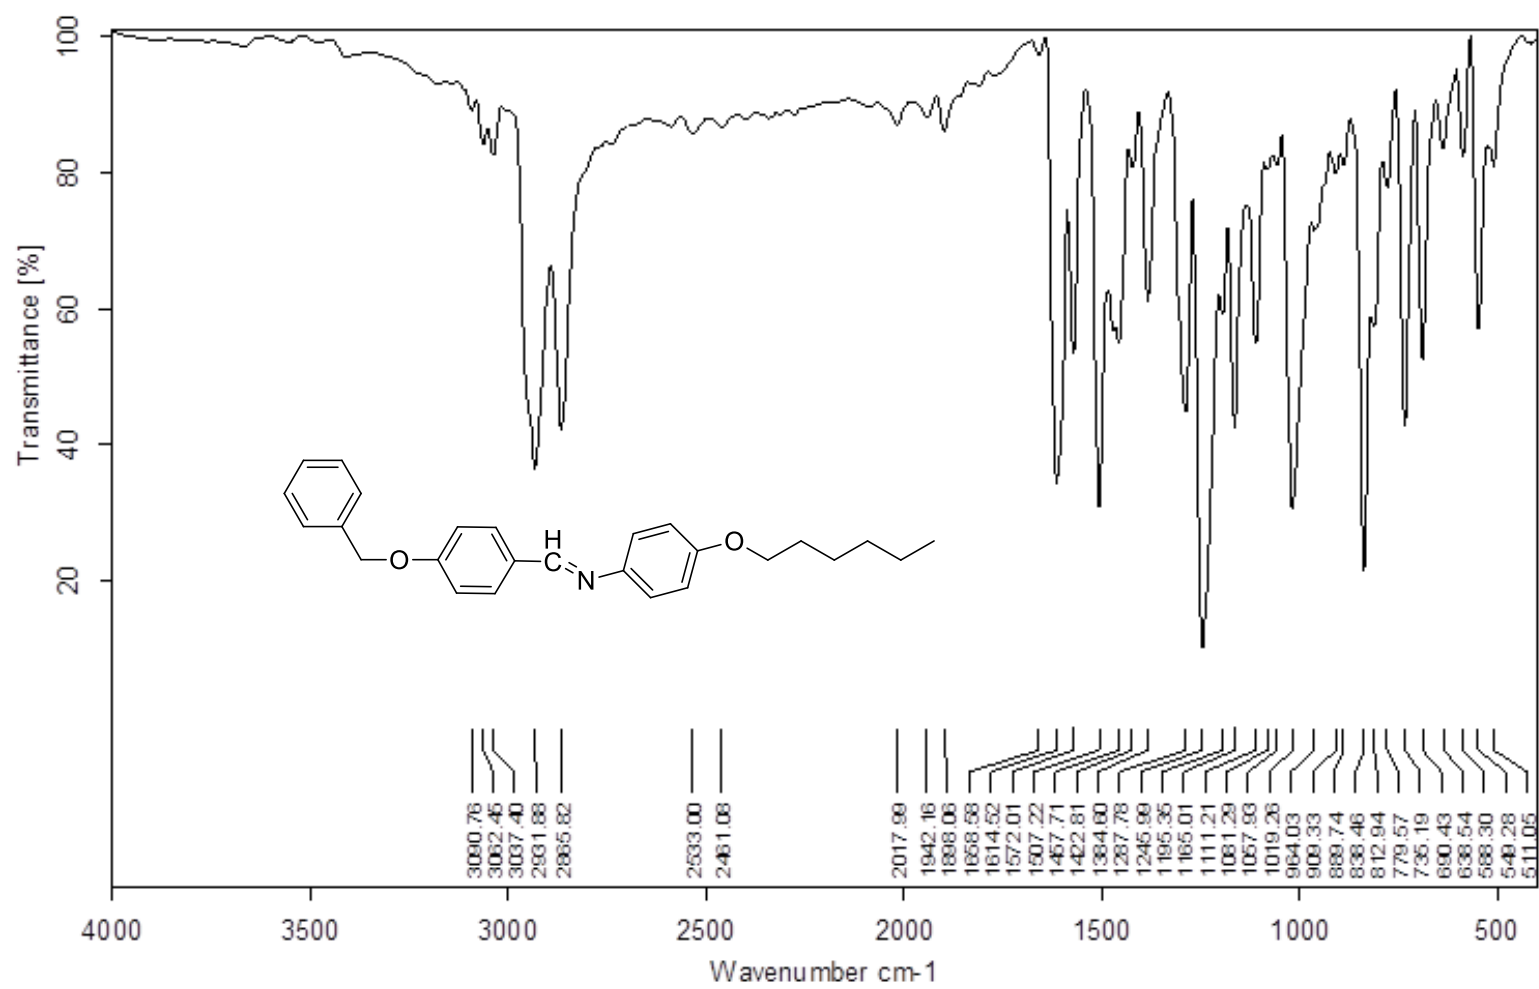

Figure S1. IR (KBr) spectrum of *(E)*-4-(hexyloxy)-*N*-(4-(benzyloxy)benzylidene)aniline **16**

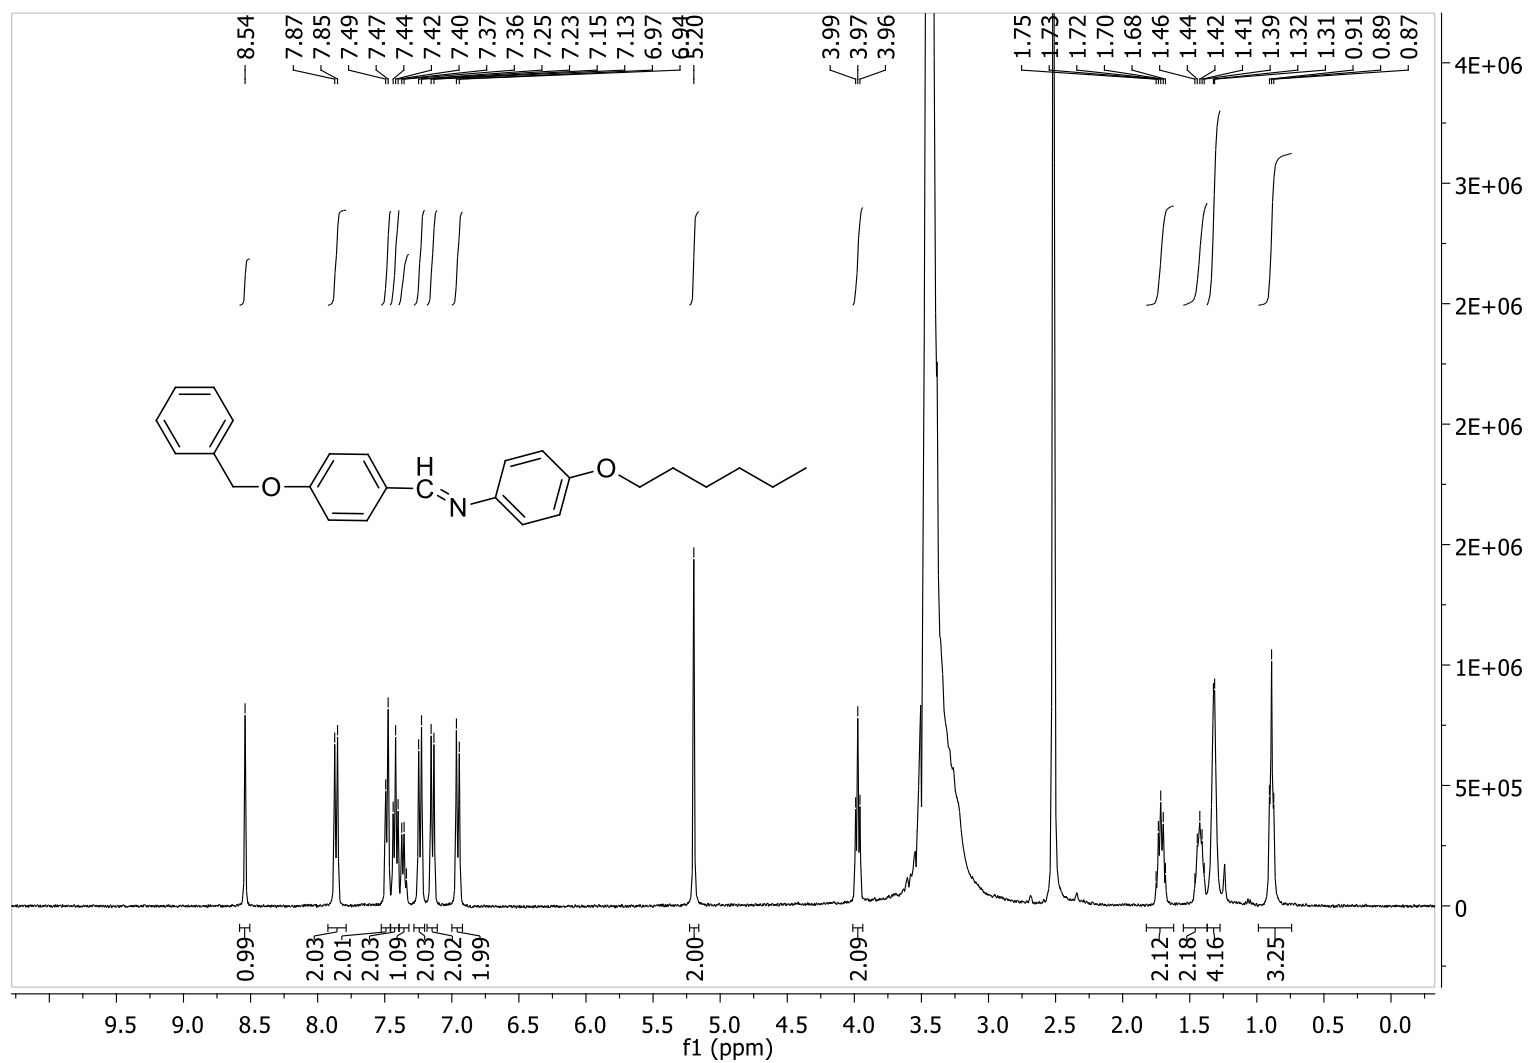

Figure S2.  $^1\text{H}$  NMR ( $\text{DMSO-}d_6$ ) spectrum of *(E)*-4-(hexyloxy)-*N*-(4-(benzyloxy)benzylidene)aniline **16**

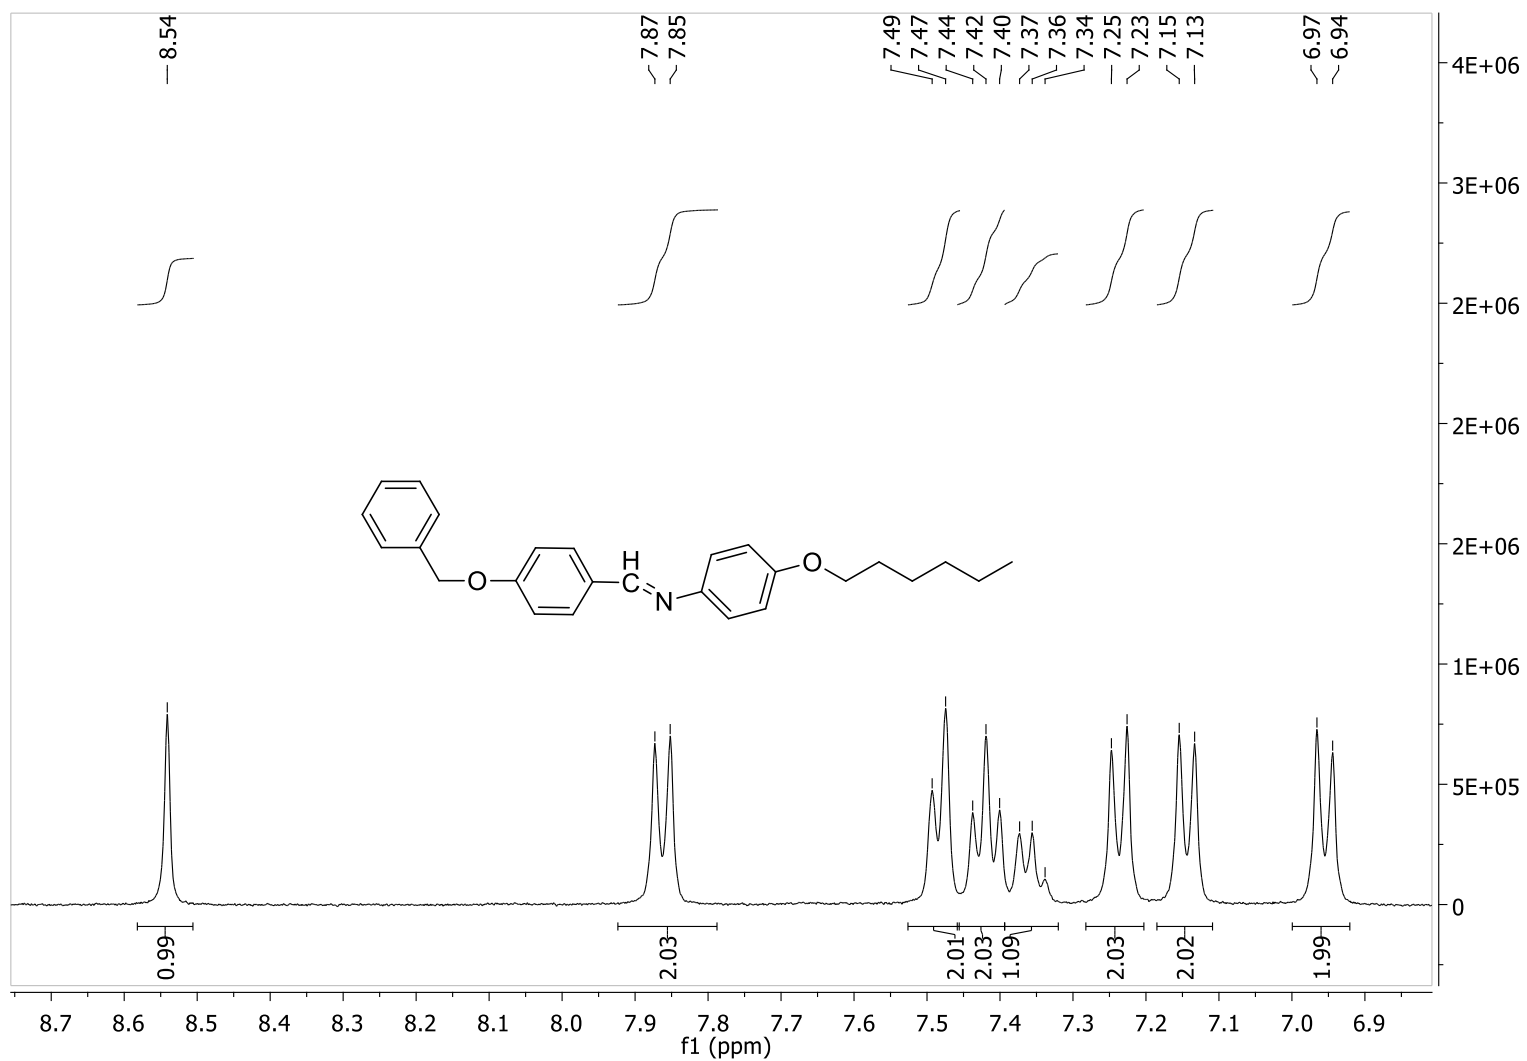

Figure S3.  $^1\text{H}$  NMR ( $\text{DMSO-}d_6$ ) spectrum of *(E)*-4-(hexyloxy)-*N*-(4-(benzyloxy)benzylidene)aniline **16**

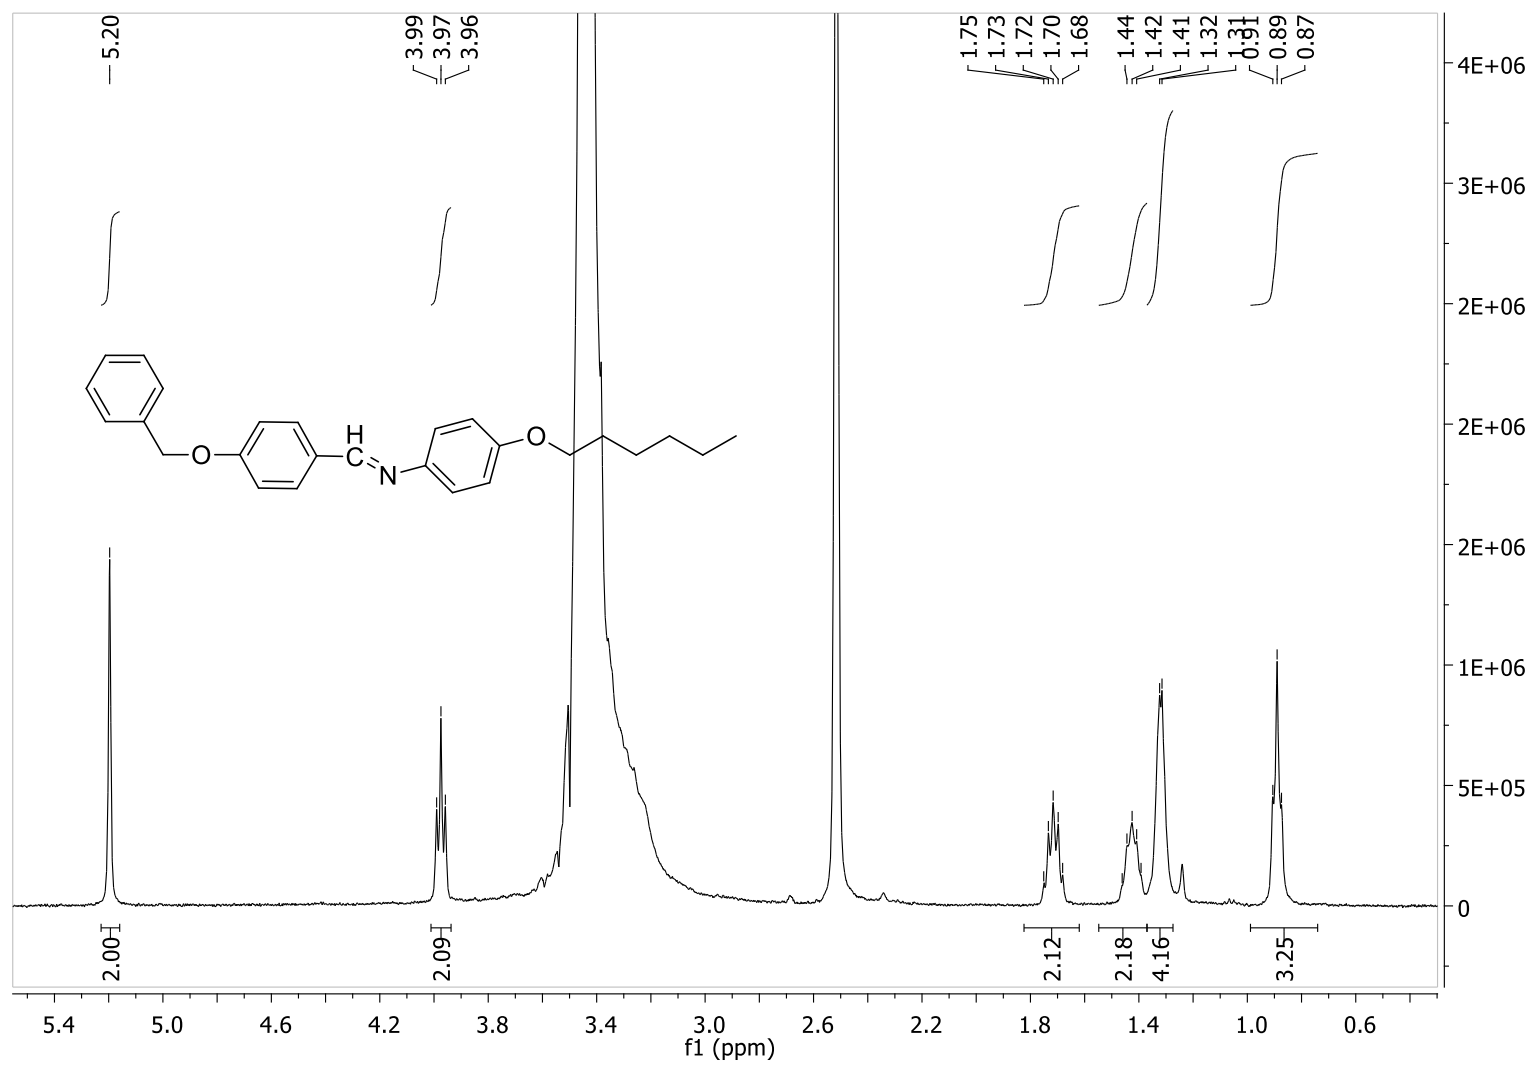

Figure S4.  $^1\text{H}$  NMR ( $\text{DMSO-}d_6$ ) spectrum of *(E)*-4-(hexyloxy)-*N*-(4-(benzyloxy)benzylidene)aniline **16**

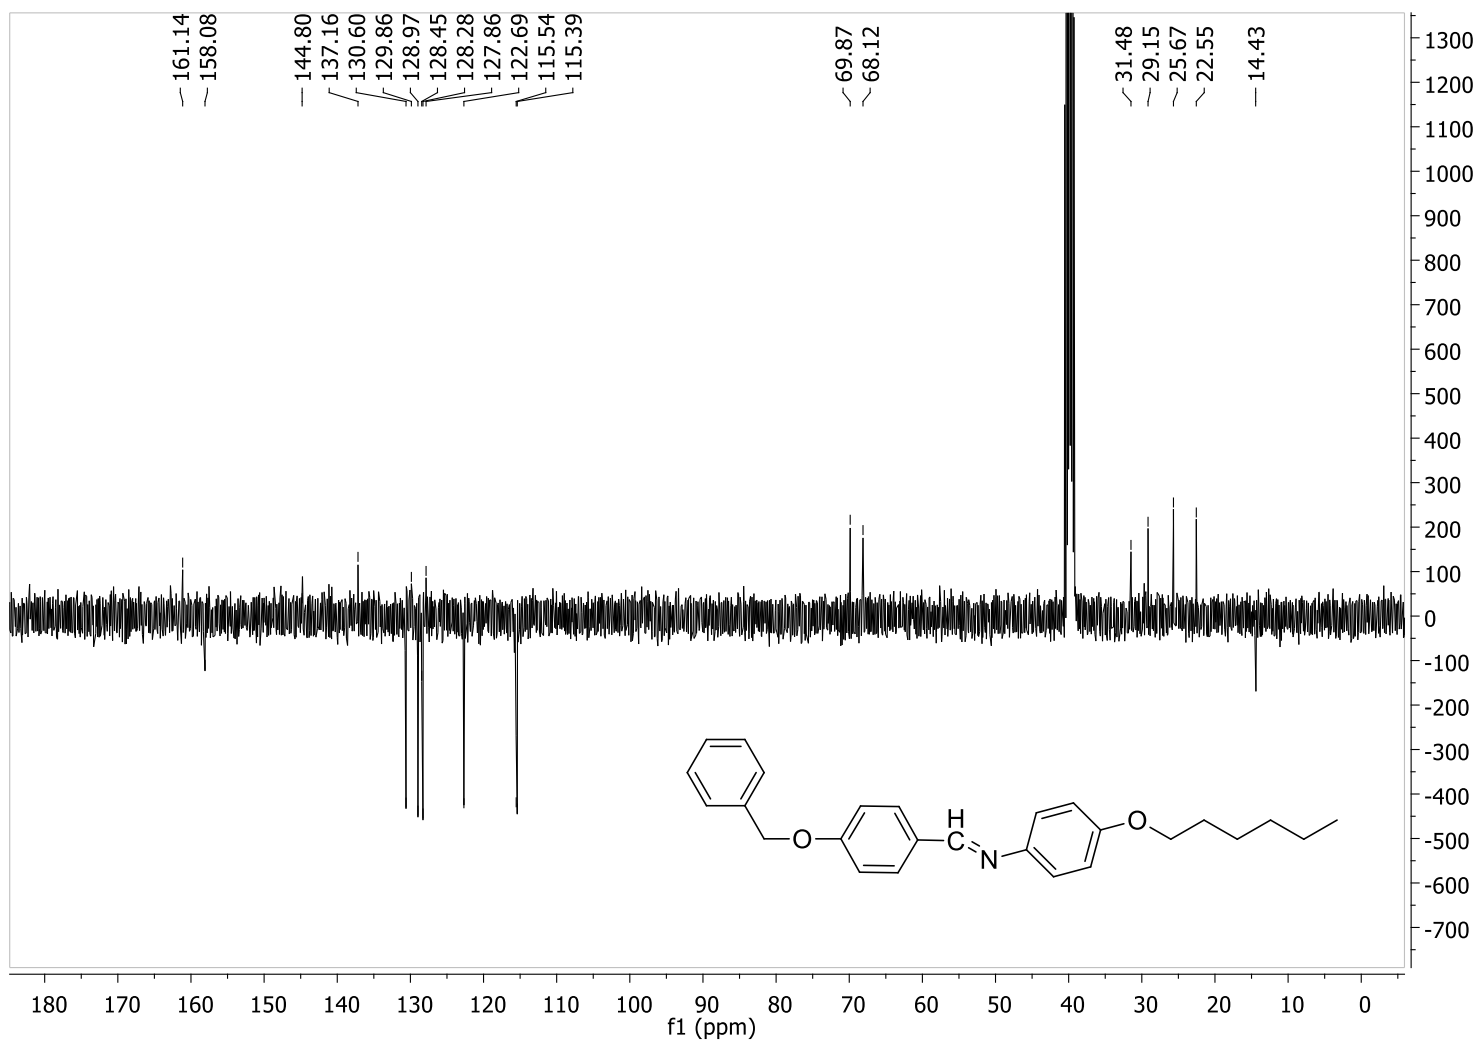

Figure S5. <sup>13</sup>C NMR (DMSO-*d*<sub>6</sub>) of *(E)*-4-(hexyloxy)-*N*-(4-(benzyloxy)benzylidene)aniline **16**

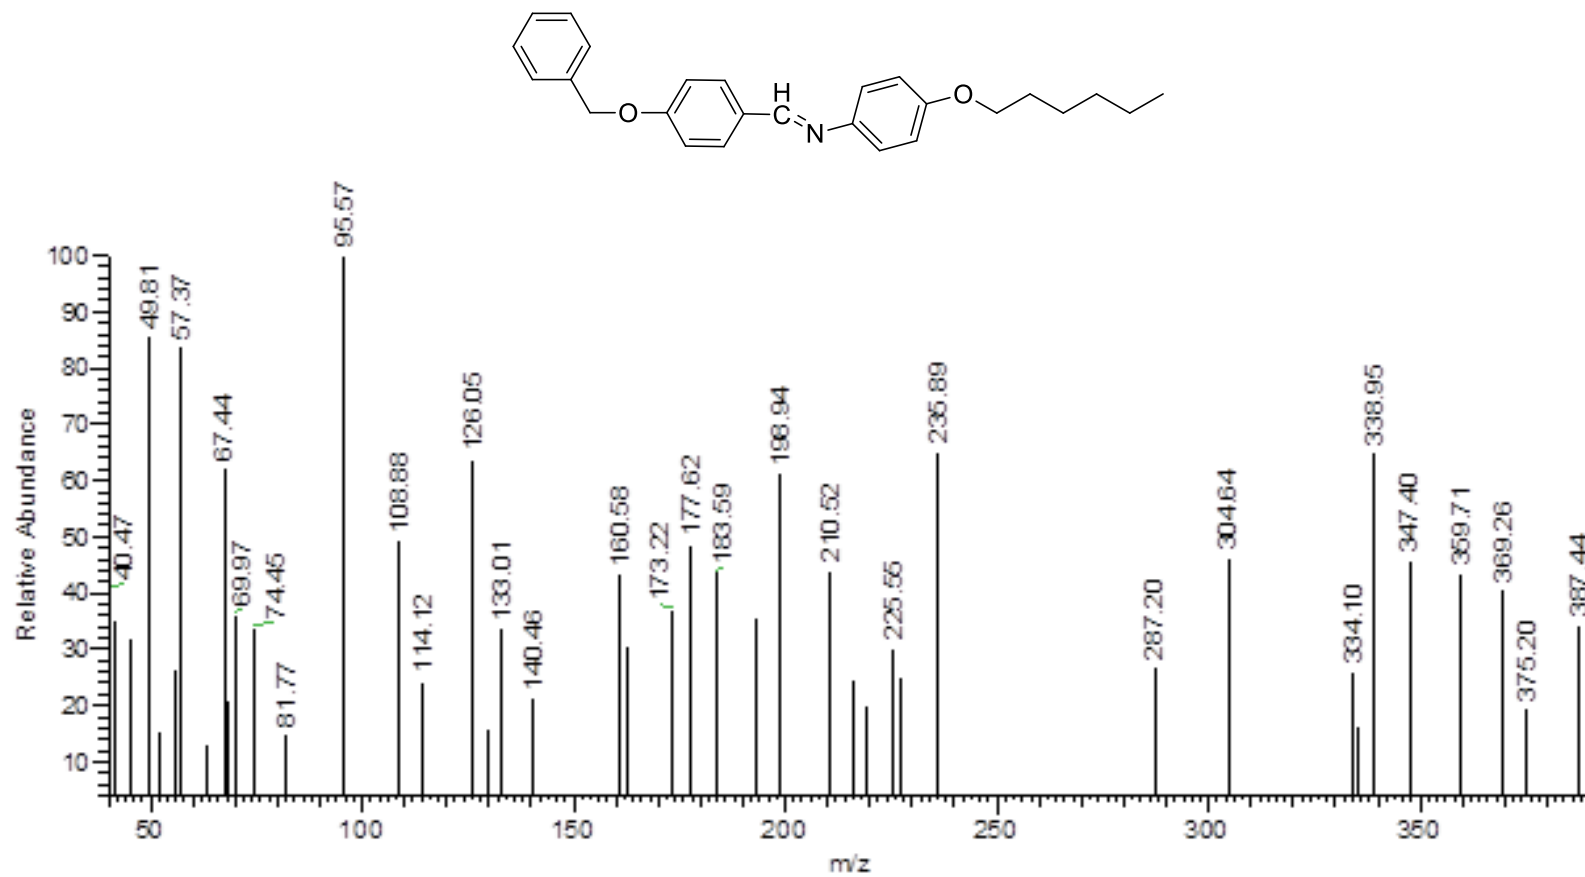

Figure S6. Mass spectrum of (*E*)-4-(hexyloxy)-*N*-(4-(benzyloxy)benzylidene)aniline **I**<sub>6</sub>

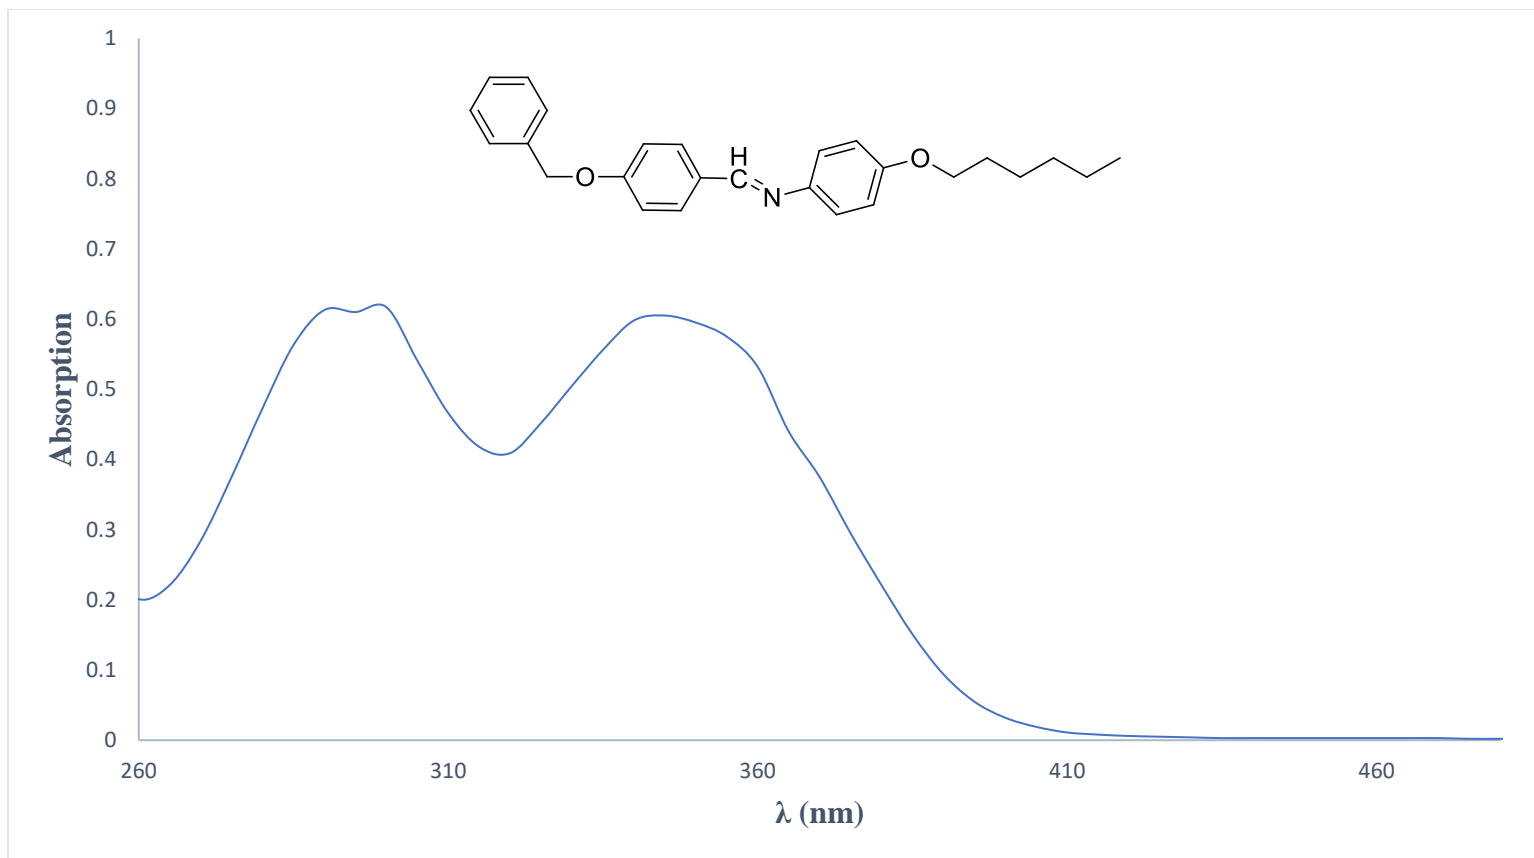

Figure S7. UV spectrum of (*E*)-4-(hexyloxy)-*N*-(4-(benzyloxy)benzylidene)aniline **16** in methanol



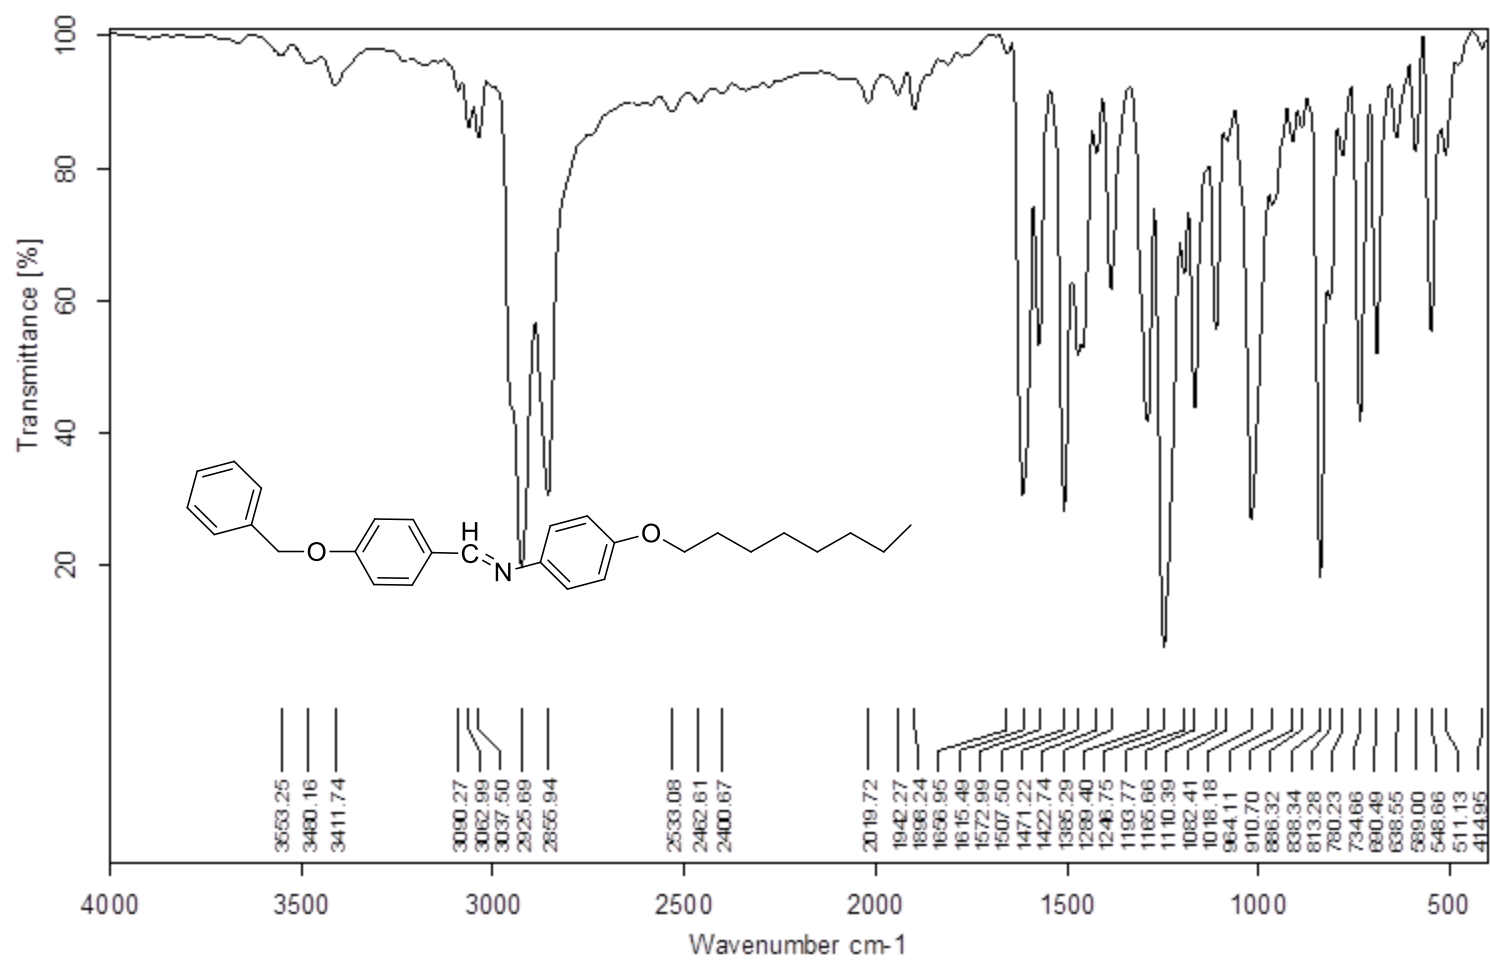

Figure S8. IR (KBr) spectrum of *(E)*-4-(octyloxy)-*N*-(4-(benzyloxy)benzylidene)aniline **18**

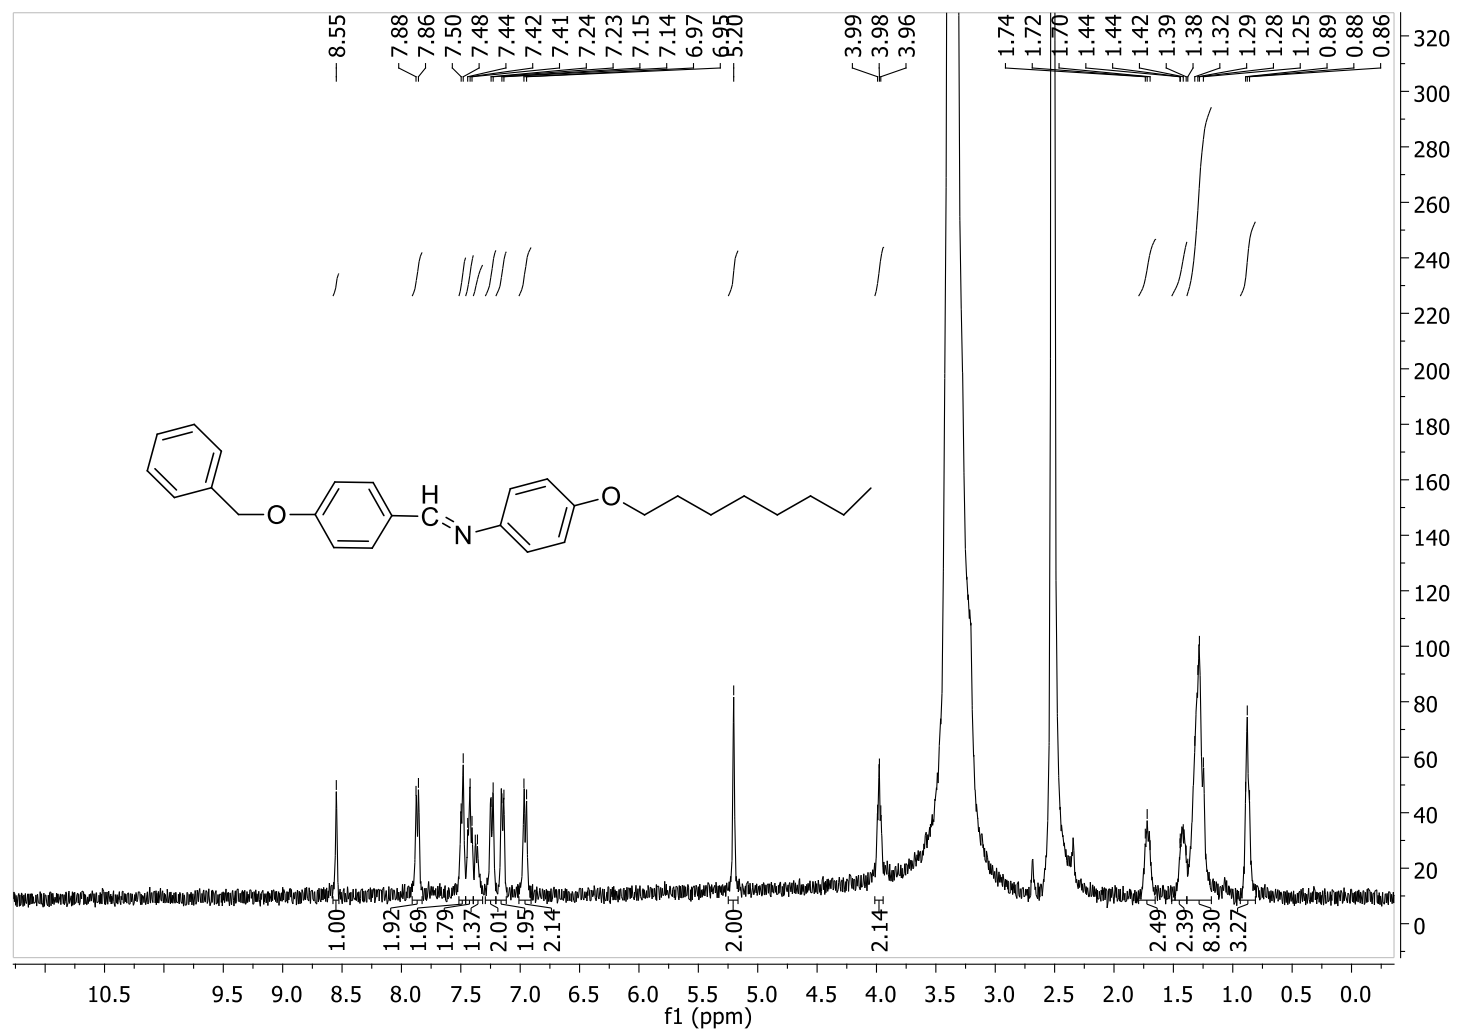

Figure S9.  $^1\text{H}$  NMR ( $\text{DMSO-}d_6$ ) spectrum of  $(E)$ -4-(octyloxy)- $N$ -(4-(benzyloxy)benzylidene)aniline **18**

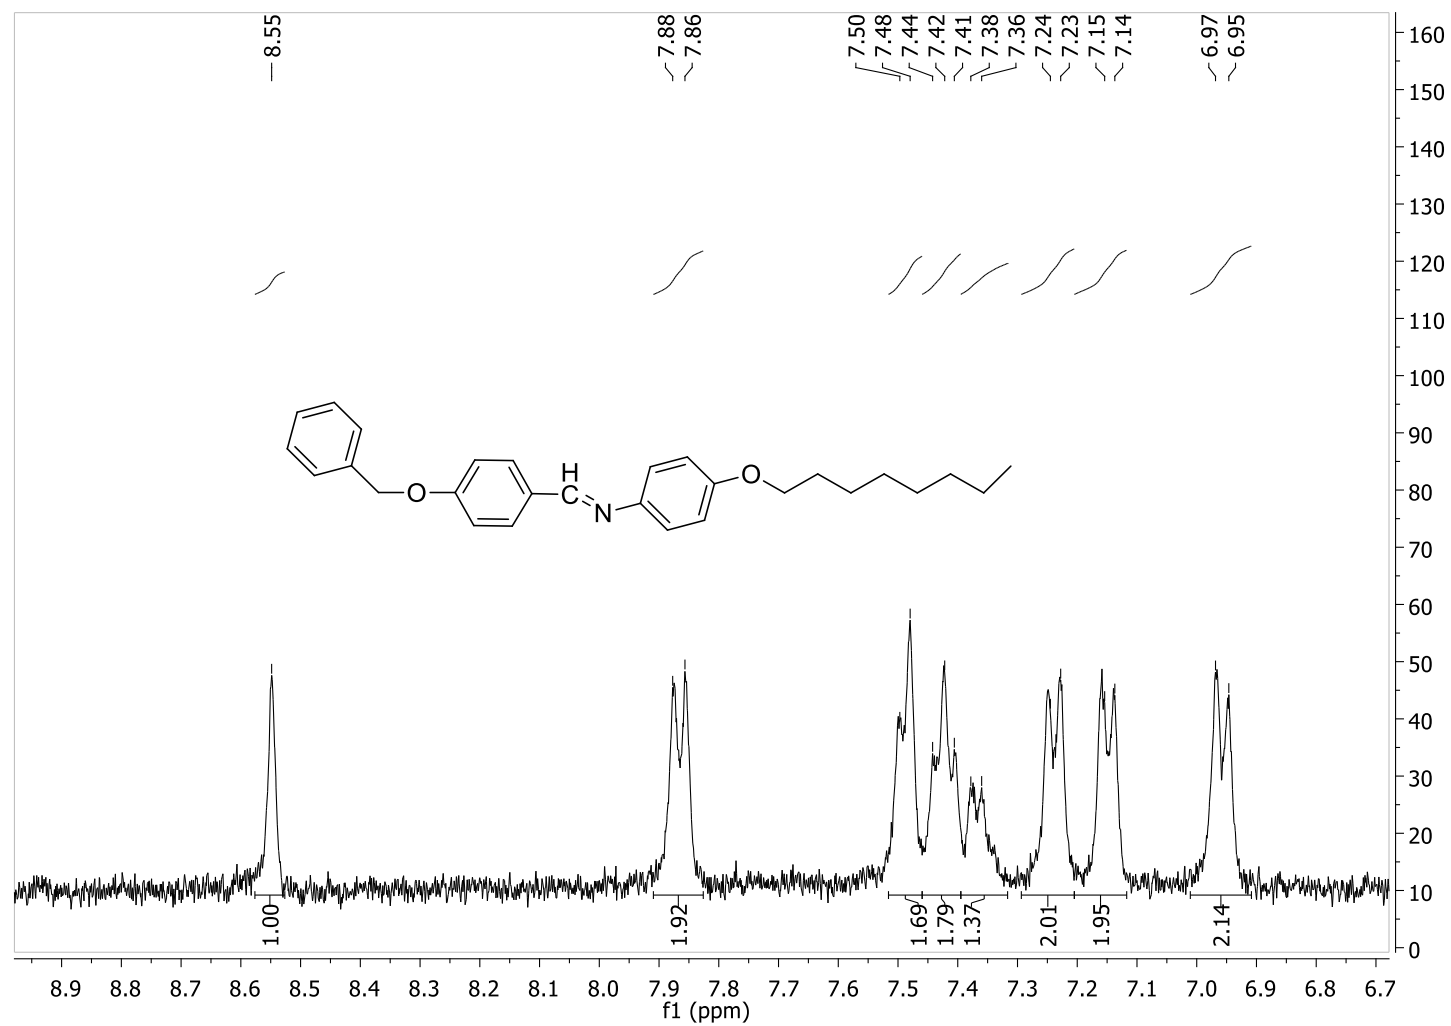

Figure S10.  $^1\text{H}$  NMR ( $\text{DMSO-}d_6$ ) spectrum of *(E)*-4-(octyloxy)-*N*-(4-(benzyloxy)benzylidene)aniline **1s**

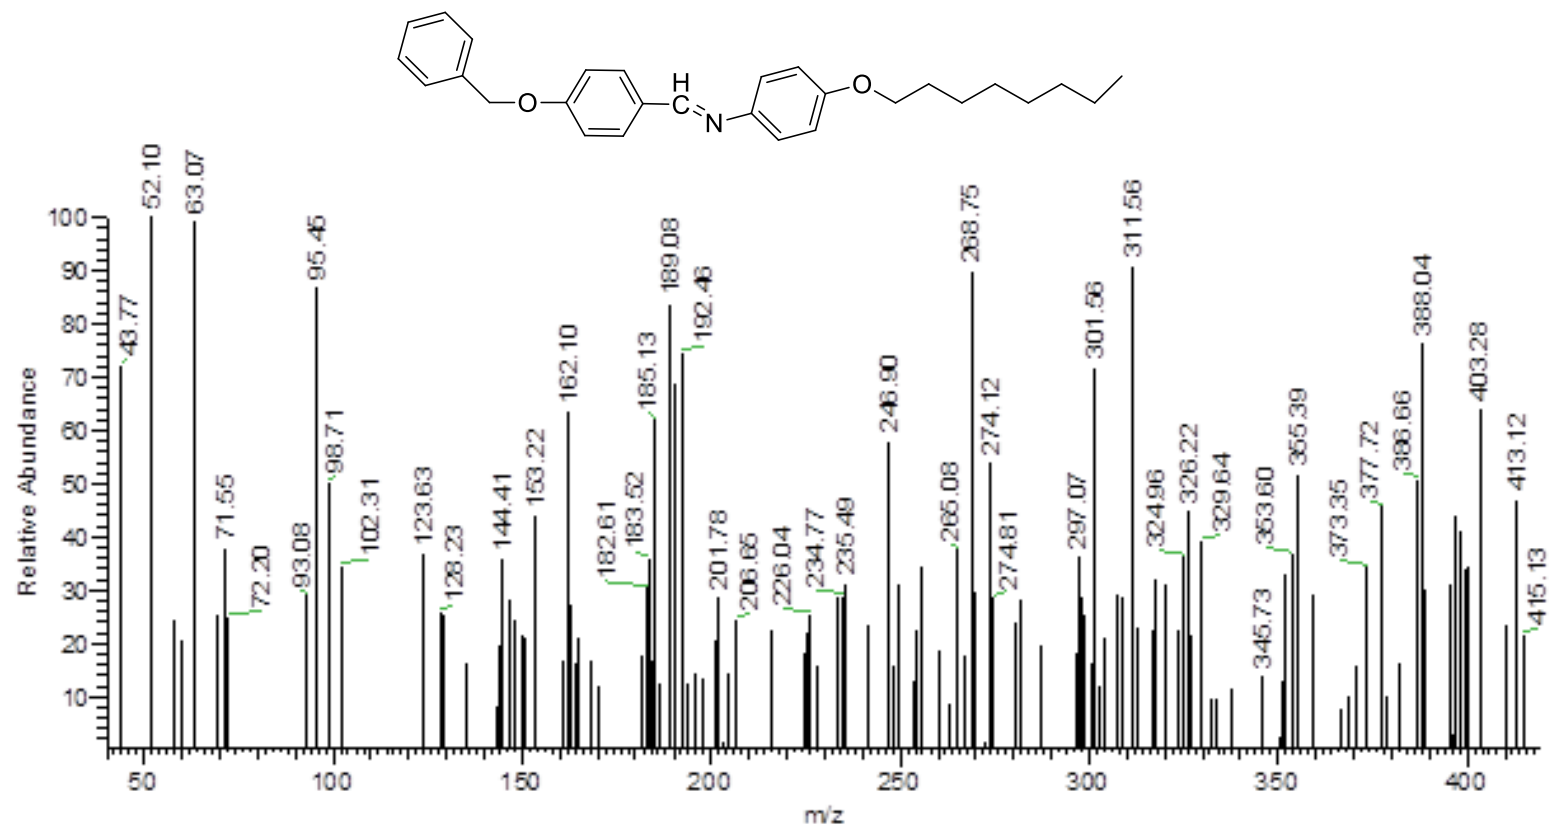

Figure S11. Mass spectrum of (*E*)-4-(octyloxy)-*N*-(4-(benzyloxy)benzylidene)aniline **18**

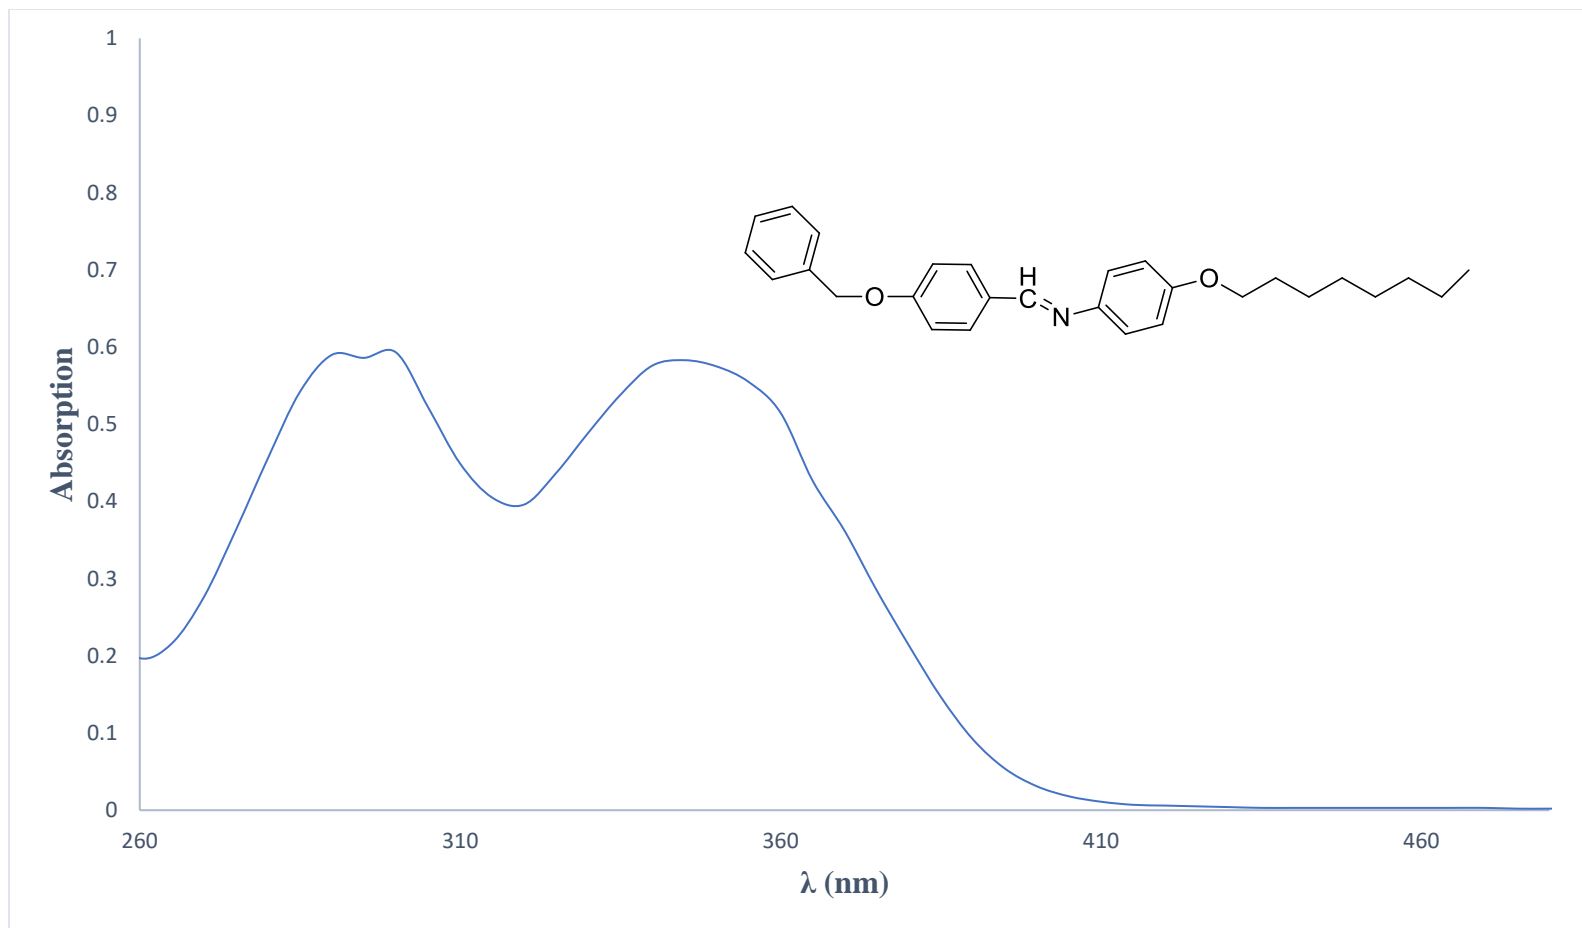

Figure S12. UV spectrum of *(E)*-4-(octyloxy)-*N*-(4-(benzyloxy)benzylidene)aniline **18**

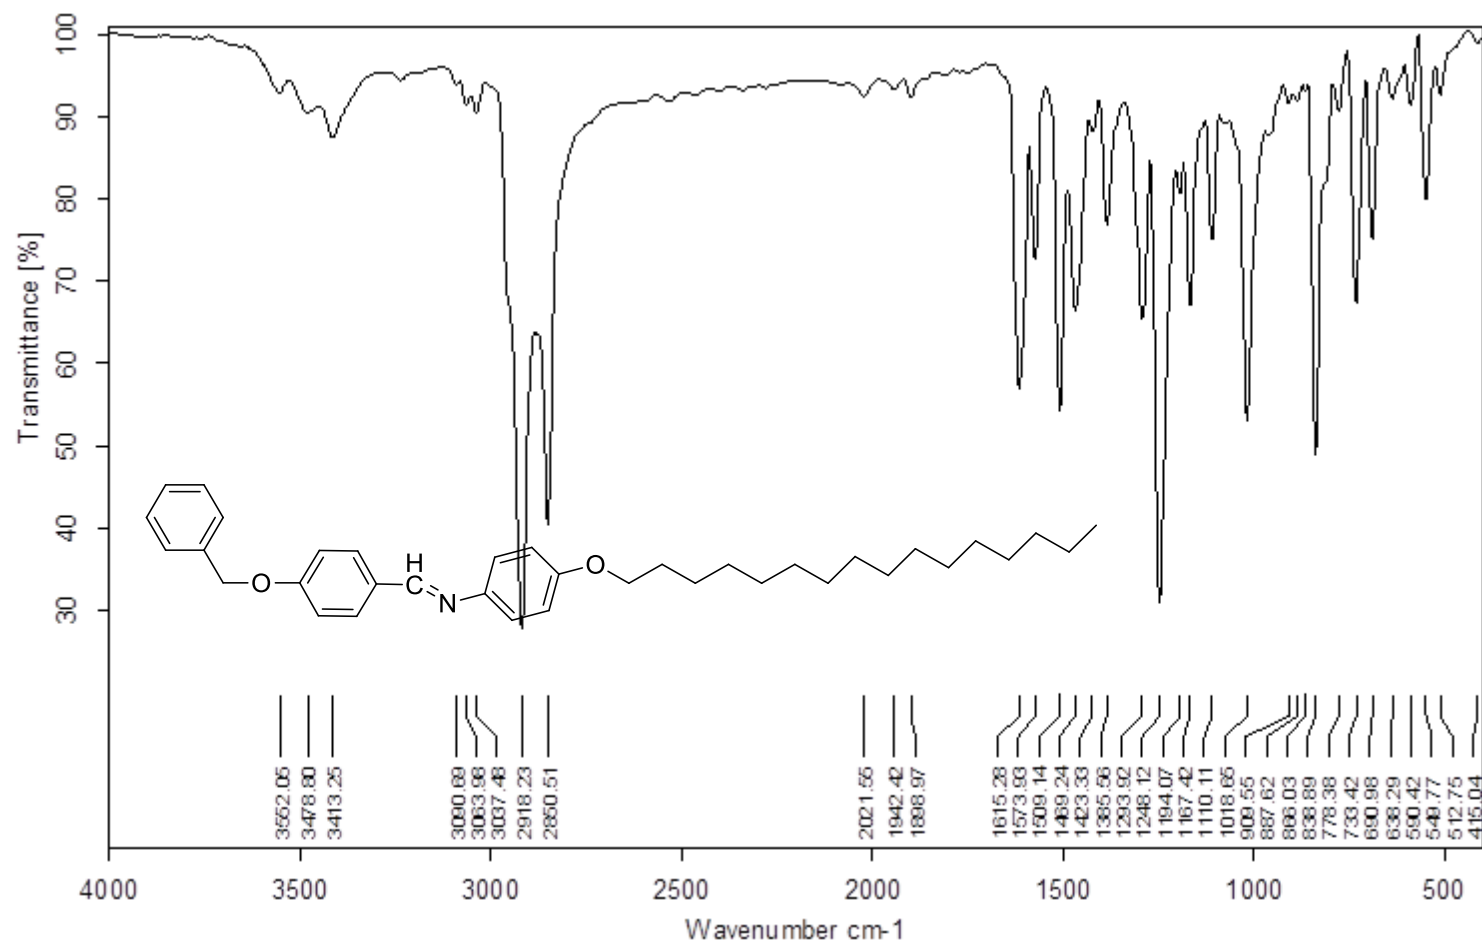

Figure S13. IR (KBr) spectrum of *(E)*-4-(hexadecyloxy)-*N*-(4-(benzyloxy)benzylidene)aniline **I16**

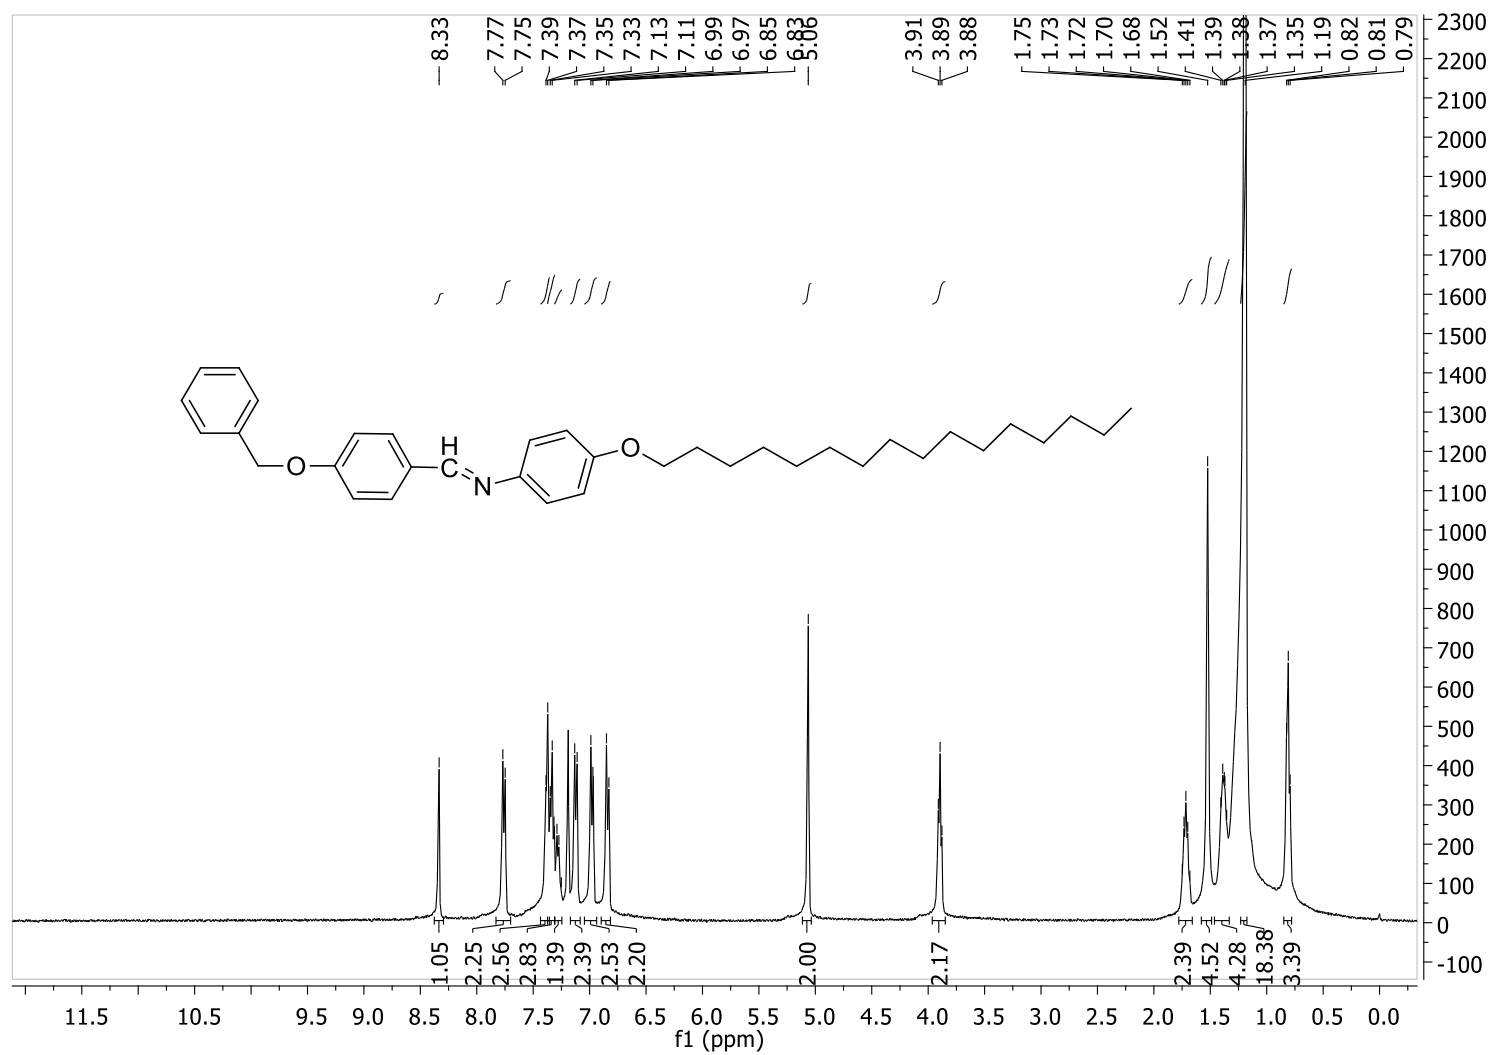

Figure S14. <sup>1</sup>H NMR (CDCl<sub>3</sub>) spectrum of *(E)*-4-(hexadecyloxy)-*N*-(4-(benzyloxy)benzylidene)aniline **I16**

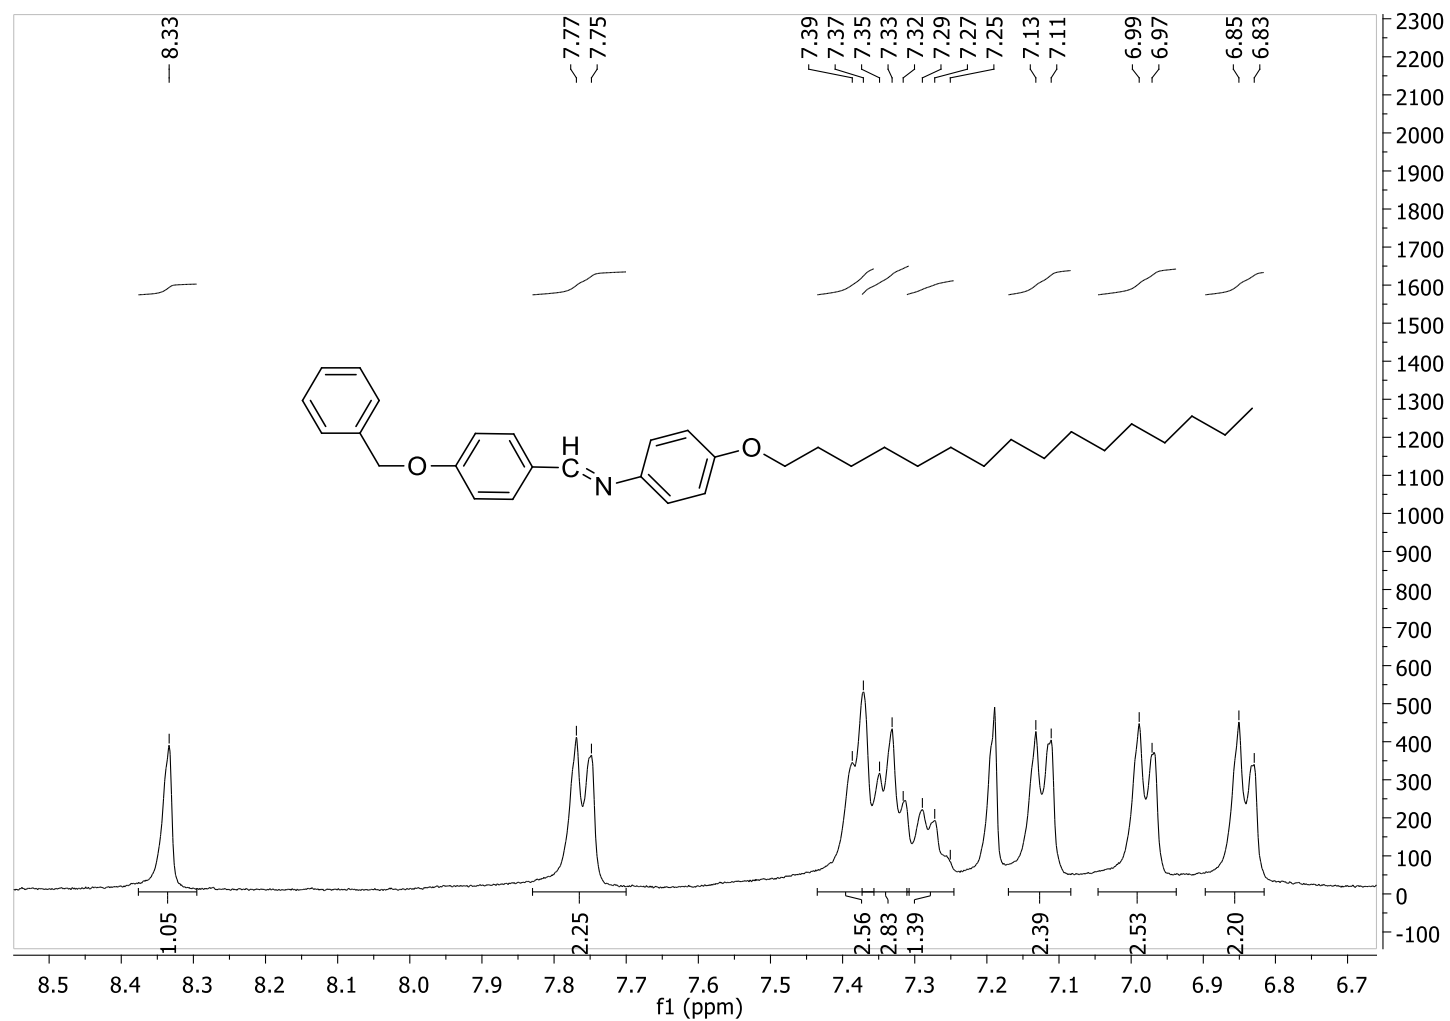

Figure S15.  $^1\text{H}$  NMR ( $\text{CDCl}_3$ ) spectrum of *(E)*-4-(hexadecyloxy)-*N*-(4-(benzyloxy)benzylidene)aniline **I16**



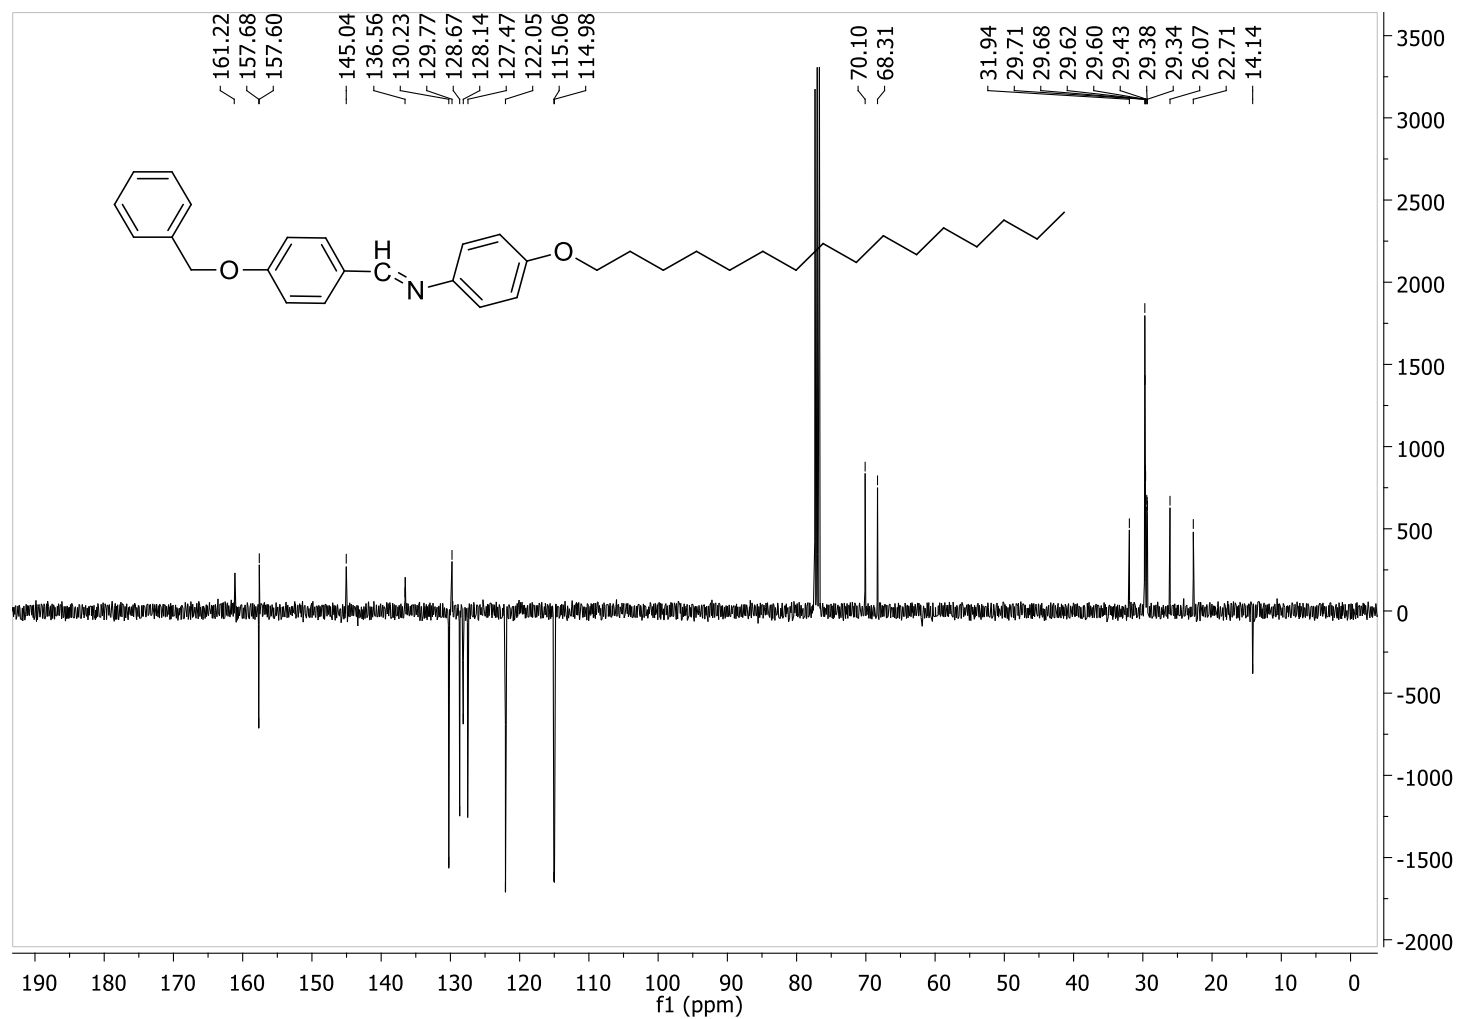

Figure S16. <sup>13</sup>C APT NMR (CDCl<sub>3</sub>) of *(E)*-4-(hexadecyloxy)-*N*-(4-(benzyloxy)benzylidene)aniline **I**<sub>16</sub>

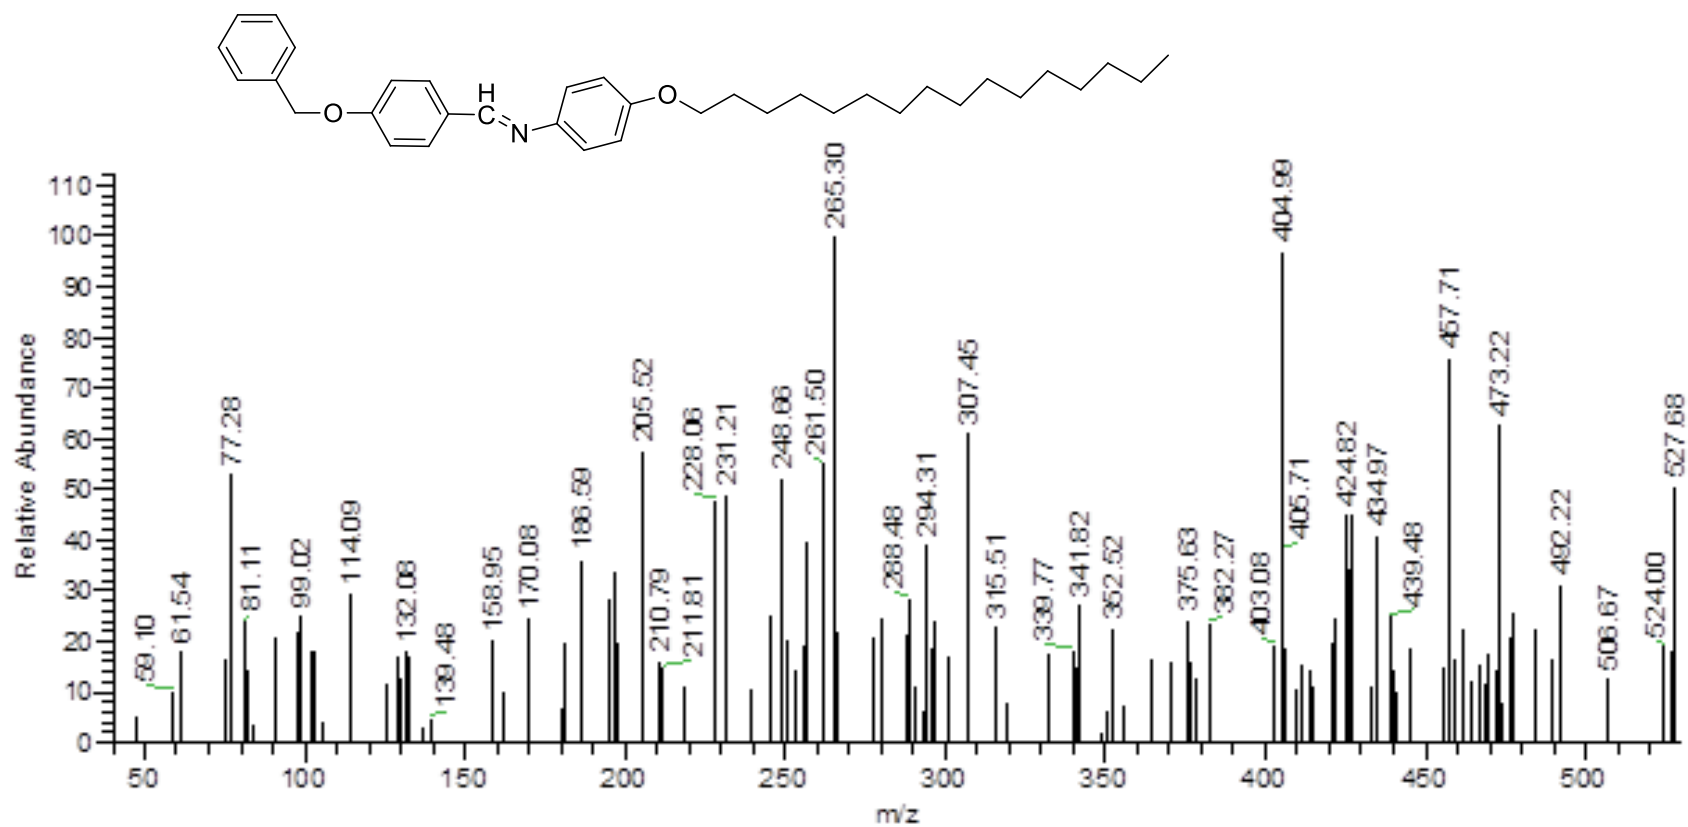

Figure S17. Mass spectrum of *(E)*-4-(hexadecyloxy)-*N*-(4-(benzyloxy)benzylidene)aniline **16**

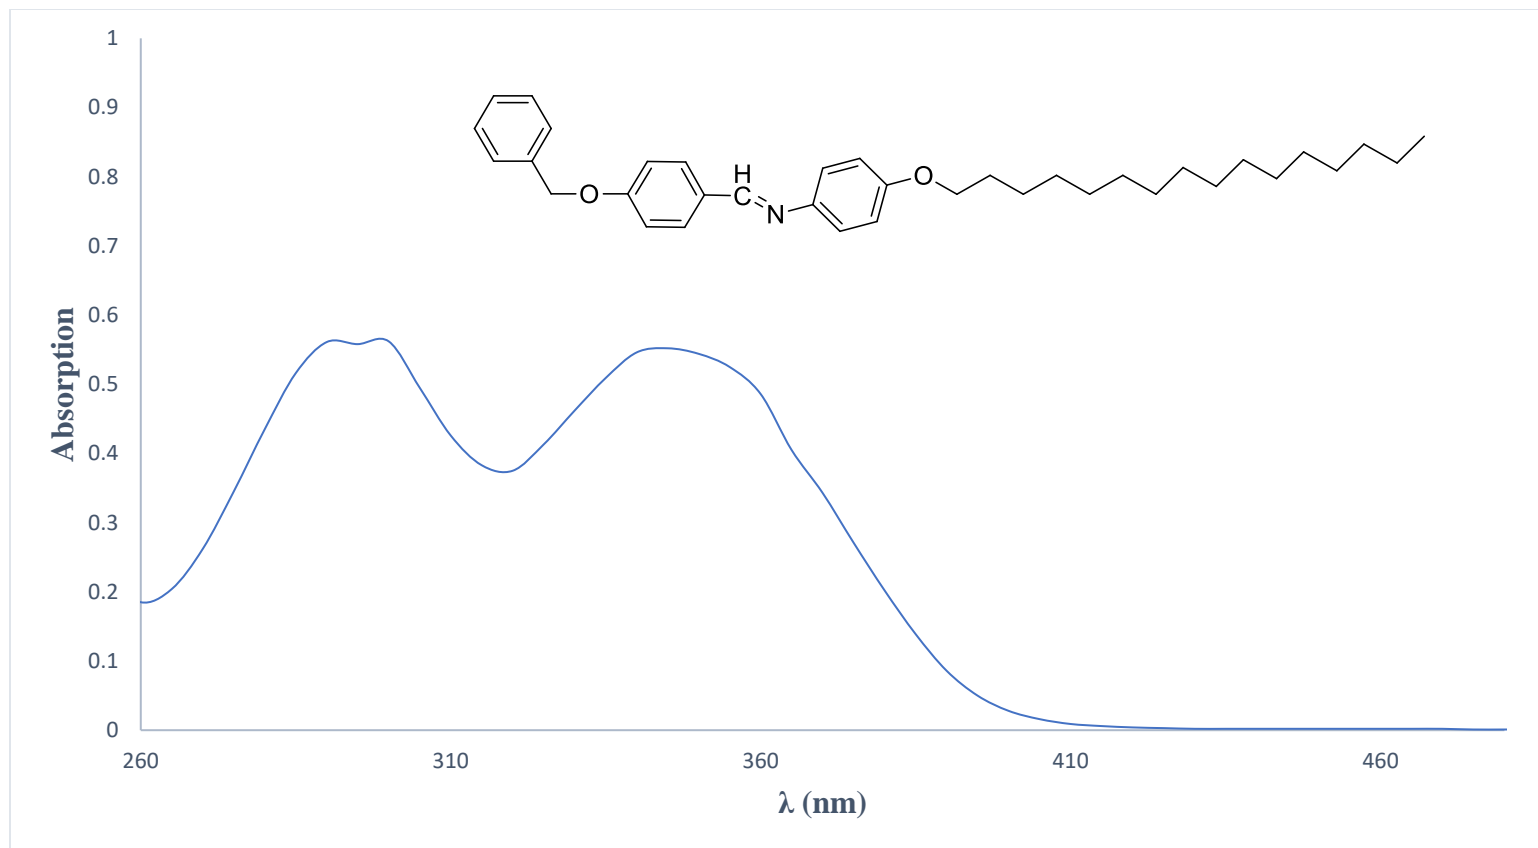

Figure S18. UV spectrum of (*E*)-4-(hexadecyloxy)-*N*-(4-(benzyloxy)benzylidene)aniline **I16** in methanol
